# Supplementary material for: Developing culturally-adapted mobile mental health interventions: a mixed methods approach
Source: PubMed Central journal article supplement — Mhealth. 2023 Jan 28;9:1. doi: 10.21037/mhealth-22-19 (PMC9902238; doi:10.21037/mhealth-22-19), 2023-01-28
Supplement: mh-09-22-19-dss.pdf [file mh-09-22-19-dss.pdf]

## Data Sharing Statement

|                     |                                                                                                                                                    |                                                            |
|---------------------|----------------------------------------------------------------------------------------------------------------------------------------------------|------------------------------------------------------------|
| <b>Article Info</b> | <a href="https://dx.doi.org/10.21037/mhealth-22-19">https://dx.doi.org/10.21037/mhealth-22-19</a>                                                  |                                                            |
| <b>Item</b>         | <b>Question</b>                                                                                                                                    | <b>Authors' Response<br/>(place "-" if not applicable)</b> |
| 1                   | Would you like to share data collected for your study to others?                                                                                   | Yes                                                        |
| 2                   | If not, would you like to share the reason for your decision?                                                                                      | -                                                          |
| 3                   | What data in particular will be shared?                                                                                                            | Demographic data, survey data, de-identified transcripts   |
| 4                   | Any other documents will be share? Such as study protocol, statistical analysis plan, informed consent form, clinical study report, analytic code. | Yes                                                        |
| 5                   | When will data availability begin?                                                                                                                 | Upon acceptance                                            |
| 6                   | When will data availability end?                                                                                                                   | Until 3 years after acceptance                             |
| 7                   | To whom will you share the data?                                                                                                                   | Researchers                                                |
| 8                   | For what type of analysis or purpose?                                                                                                              | mHealth Design                                             |
| 9                   | How or where can the data/documents be obtained?                                                                                                   | Email Corresponding Author                                 |
| 10                  | Any other restrictions?                                                                                                                            | -                                                          |
